# Supplementary material for: BnSGS3 Has Differential Effects on the Accumulation of CMV, ORMV and TuMV in Oilseed Rape
Source: MDPI journal article supplement (doi:10.3390/v7082815), 2015-07-27
Supplement: s1 [file s1]

## Supplementary Information

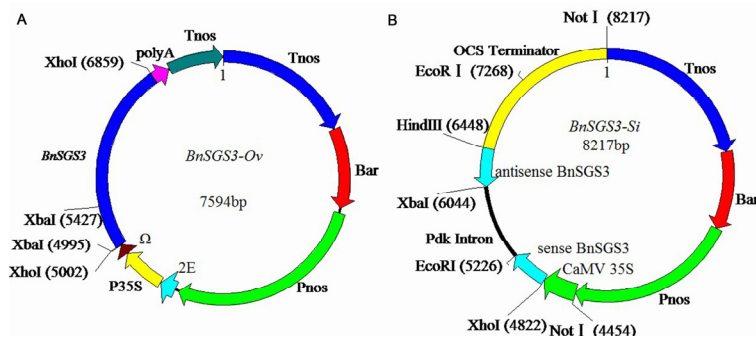

**Figure S1.** The schematic diagram of the *suppressor of gene silencing 3* in *Brassica napus* (*BnSGS3*)-overexpressing vector (*BnSGS3-Ov*) (A) and *BnSGS3*-silenced vector (*BnSGS3-Si*) (B). (A) *BnSGS3-Ov* containing the *Cauliflower mosaic virus* (CaMV) 35S enhancer, double CaMV 35S promoter, Ω sequence, *BnSGS3* cDNA, and the CaMV Nos terminator; (B) *BnSGS3-Si* containing CaMV 35S promoter, *BnSGS3* sense and antisense repetitive sequence, Pdk intron and OCS terminator.

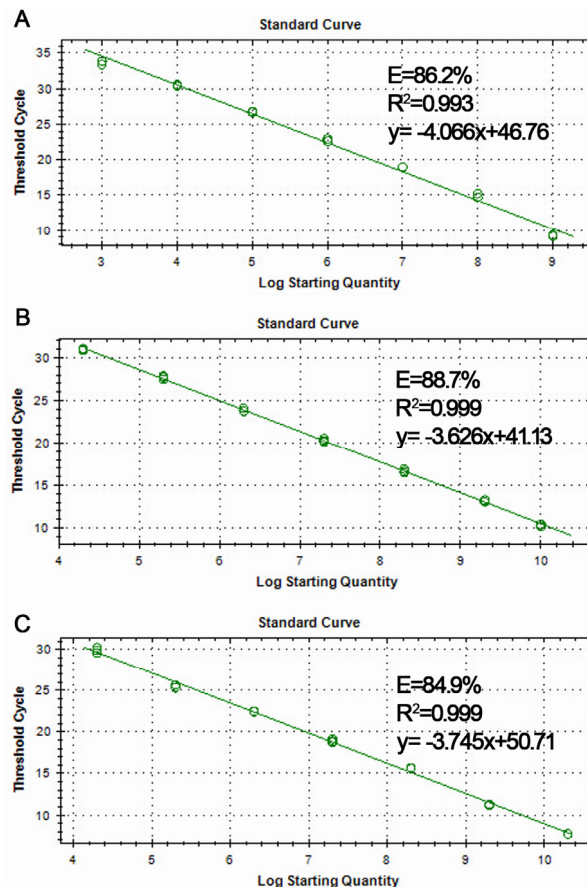

**Figure S2.** Standard curves for three viruses' amplification. (A) Standard curve for *Oilseed rape mosaic virus* (ORMV) viral plasmid; (B) Standard curve for *Turnip mosaic virus* (TuMV) viral plasmid; (C) Standard curve for *Cucumber mosaic virus* (CMV) viral plasmid.
